# Supplementary material for: A 64 kDa sucrose binding protein is membrane-associated and tonoplast-localized in developing mung bean seeds
Source: PubMed Central journal article supplement — J Exp Bot. 2009 Jan 6;60(2):629–39. doi: 10.1093/jxb/ern308 (PMC2651462; doi:10.1093/jxb/ern308), 2009-01-06
Supplement: ern308_1.pdf [file ern308_1.pdf]

|        |     |                                                      |     |
|--------|-----|------------------------------------------------------|-----|
| GmSBP1 | 1   | MGMRTKLSLAIFFFLLALFSNLAFGKCKETEVEEEDPELVTCKHQCOQQ    | 50  |
| GmSBP2 | 1   | MATRAKLSLAIFLFFLLALISNLALGKLETEVEE-DPELVTCKHQCOQQ    | 49  |
| VrSBP1 | 1   | KKETEVAADPELKTQKHQLL--                               | 20  |
|        |     | *****      **** * **                                 |     |
| GmSBP1 | 51  | QQYTEGDKRVCLQSCDRYHRMKQEREKQIQEETREKKEEESREREEEQQE   | 100 |
| GmSBP2 | 50  | RQYTESDKRTCLQQCD---SMKQEREKQVEEETREK-----EEEHQE      | 88  |
| VrSBP1 | 21  | -----                                                | 20  |
| GmSBP1 | 101 | QHEEQ-DENPYIFEEEDKDFETRVETEGGRIRVLKKFTEKSKLLQGIENFR  | 149 |
| GmSBP2 | 89  | QHEEEEDENPYVFEEEDKDFSTRVETEGGSIRVLKKFTEKSKLLQGIENFR  | 138 |
| VrSBP1 | 21  | -----                                                | 20  |
| GmSBP1 | 150 | LAILEARAHTFVSPRHFVDFSEVFFNIKGRAVLGLVSESETEKITLEPGDM  | 199 |
| GmSBP2 | 139 | LAILEARAHTFVSPRHFVDFSEVFLFNIKGRAVLGLVRESETEKITLEPGDM | 188 |
| VrSBP1 | 21  | -----                                                | 20  |
| GmSBP1 | 200 | IHIPAGTPLYIVNRDENDKFLFLAMLHIPVSVSTPGKFEFFAPGGRDPES   | 249 |
| GmSBP2 | 189 | IHIPAGTPLYIVNRDENEKLLLAMLHIP--VSTPGKFEFFGPGGRDPES    | 236 |
| VrSBP1 | 21  | -----FEEFFGPGGR----                                  | 30  |
|        |     | *****      ****                                      |     |
| GmSBP1 | 250 | VLSAFSOWNVLQAAALQTPKGKLENVFDQQNEGSIFRISREQVRALAPTKKS | 299 |
| GmSBP2 | 237 | VLSAFSOWNVLQAAALQTPKGKLERLFNQNEGSIFKISRERVRALAPTKKS  | 286 |
| VrSBP1 | 31  | -----                                                | 30  |
| GmSBP1 | 300 | SWWPFGGESKPOFNIFSKRPTISNGYGRLETVGPDDDEKSWLQRLNLMLT   | 349 |
| GmSBP2 | 287 | SWWPFGGESKAQFNIFSKRPTFSNGYGRLETVGPDD-EKSWLQRLNLMLT   | 335 |
| VrSBP1 | 31  | -----YGTLEAAPS-----SR                                | 43  |
|        |     | **    ***    *    *                                  |     |
| GmSBP1 | 350 | FTNITQRSMSTIHYNHSHATKIALVIDGRGHLQISCPHMSSRSSHSHKDKS  | 399 |
| GmSBP2 | 336 | FTNITQRSMSTIHYNHSHATKIALVMDGRGHLQISCPHMSSRS-DSKDKS   | 384 |
| VrSBP1 | 44  |                                                      | 43  |
| GmSBP1 | 400 | SPSYHRISDLKPGMVVFPVPPGHFVTIASNKENLLMICFEVNARDNKKF    | 449 |
| GmSBP2 | 385 | SPSYHRISADLKPGMVVFPVPPGHFVTIASNKENLLIICFEVNVRDNKKF   | 434 |
| VrSBP1 | 44  |                                                      | 43  |
| GmSBP1 | 450 | TFAGKDNISSLDNVAKELAFNYPSEMVNGVFLQRFLEKLIIGRLYHLP     | 499 |
| GmSBP2 | 435 | TFAGKDNISSLDNVAKELAFNYPSEMVNGVS-----                 | 466 |
| VrSBP1 | 44  |                                                      | 43  |
